# Supplementary material for: A high-capacity iron silicide–air primary battery in an acidic saline electrolyte
Source: Royal Society of Chemistry journal article supplement (doi:10.1039/c9nj05607f), 2019-12-16
Supplement: c9nj05607f1.pdf [file c9nj05607f1.pdf]

*Electronic Supplemental Information (ESI) for New Journal of Chemistry*

**A High-Capacity Iron Silicide Air Primary Battery  
in an Acidic Saline Electrolyte**

Junjie Wang<sup>a</sup>, Lifeng Cui<sup>a,\*</sup>, Shasha Li<sup>b</sup>, Tingting Pu<sup>a</sup>, Xueyou Fang<sup>c</sup>, Shifei Kang<sup>a</sup>,  
Xiaodong Zhang<sup>a,\*</sup>

<sup>a</sup> School of Environment and Architecture, University of Shanghai for Science and  
Technology, Shanghai 200093, China

<sup>b</sup> School of Materials Science and Engineering, University of Shanghai for Science and  
Technology, Shanghai 200093, China

<sup>c</sup> School of Environmental Science and Engineering, Yancheng Institution of  
Technology, Yancheng, JiangSu 224051, China

\*Corresponding authors E-mail addresses: fatzhxd@126.com (X. Zhang);  
lifeng.cui@gmail.com (L. Cui).

## 1. Material characterization

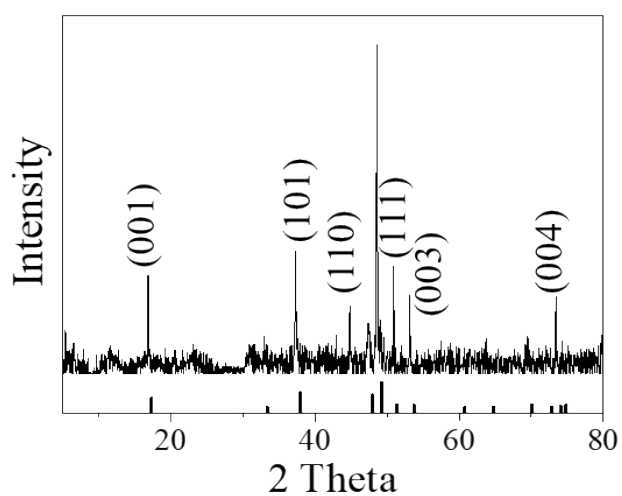

**Fig. S1** XRD patterns of pretreated FeSi<sub>2</sub> powder.

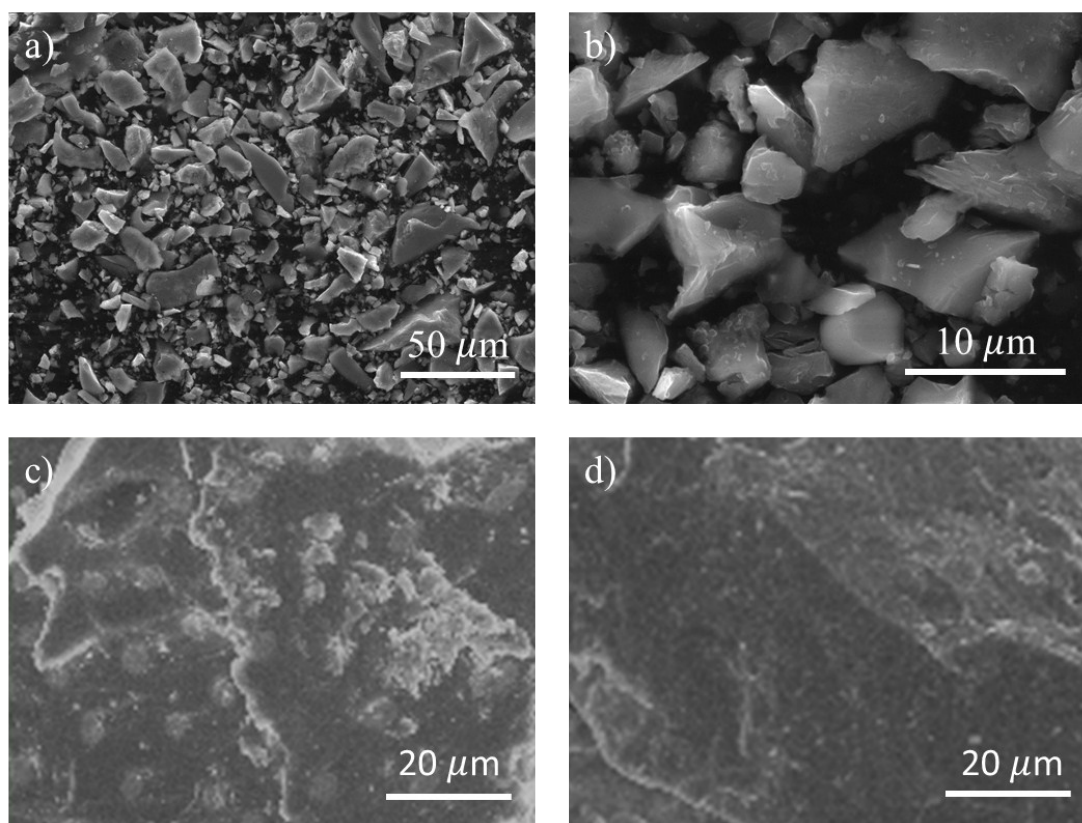

**Fig. S2** SEM images of a) and b) FeSi<sub>2</sub> at different magnitude, c) FeSi<sub>2</sub> was immersed in 2 M H<sub>2</sub>SO<sub>4</sub> for 48 hrs and d) FeSi<sub>2</sub> was immersed in 2 M H<sub>2</sub>SO<sub>4</sub> which contained F<sup>-</sup> ions for 48 hrs.

## 2. Corrosion rate

A corrosion-time plots obtained by ICP-AES technique of the solutions for iron corrosion can be found in research by M.A. Amin *et.al.* [1]

Find the mass of Fe dissolved and time

Mass of Fe dissolved =  $\sim 4.8 \text{ mg cm}^{-2}$

Time =  $\sim 11.5$  hours

$$\text{Corrosion rate} = \frac{4.8}{11.5} = \sim 0.42 \text{ mg cm}^{-2} \text{ hr}^{-1}$$

The corrosion rate of Fe in 1 M  $\text{H}^+$  was 28 times that of  $\text{FeSi}_2$  in ASF-2 and 89 times that of  $\text{FeSi}_2$  in ASF-0.5.

Another corrosion experiment was carried out in the research by S.M. Lee *et.al.* [2]

The size of Zn gel anode used in the reference was  $2.5 \times 2 \text{ cm}^2$

Compare the  $\text{H}_2$  evolution at 5 hrs for both Zn gel anode and  $\text{FeSi}_2$  anode.

$$\text{Area: } 2.5 \times 2 = 5 \text{ cm}^2$$

Mass of Fe = 0.365 mg (in ASF-2)

Amount of Fe = 0.00652 mmol

Amount of  $\text{H}_2$  = 0.00652 mmol

$$\text{Volume of } \text{H}_2 = 0.00652 \times 22.4 = 0.146 \text{ mL (at STP)}$$

The result indicates that the  $\text{H}_2$  evolution from Zn gel anode (in 9 M KOH at 60 °C) and  $\text{FeSi}_2$  anode (in ASF-2 at 25 °C) were  $\sim 0.56 \text{ mL}$  and  $\sim 0.15 \text{ mL}$ , respectively when both of them were immersed in electrolyte for 5 hours. Though temperature of electrolyte has significant effect on corrosion rate, we can conclude that they have similar corrosion rate (or similar magnitude).

### 3. Calculation of theoretical cell potential [3]

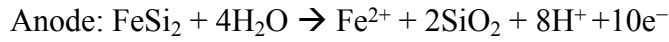

$$\Delta G_f^\theta(\text{FeSi}_2, \text{s}) = -22.6 \text{ kcal mol}^{-1}$$

$$\Delta G_f^\theta(\text{H}_2\text{O}, \text{l}) = -56.687 \text{ kcal mol}^{-1}$$

$$\Delta G_f^\theta(\text{Fe}^{2+}, \text{aq}) = -18.85 \text{ kcal mol}^{-1}$$

$$\Delta G_f^\theta(\text{SiO}_2, \text{s}) = -204.75 \text{ kcal mol}^{-1}$$

$$\Delta G_f^\theta(\text{H}^+, \text{aq}) = 0 \text{ kcal mol}^{-1}$$

$$\Delta G_R^\theta$$

$$\begin{aligned} &= \Delta G_f^\theta(\text{Fe}^{2+}, \text{aq}) + \Delta G_f^\theta(\text{SiO}_2, \text{s}) + \Delta G_f^\theta(\text{H}^+, \text{aq}) \\ &\quad - \Delta G_f^\theta(\text{FeSi}_2, \text{s}) - \Delta G_f^\theta(\text{H}_2\text{O}, \text{l}) \end{aligned}$$

$$= [(-18.85) + 2 \times (-204.75) + 0] - [(-22.6) + 4 \times (-56.687)]$$

$$= -179.00 \text{ kcal mol}^{-1} \times 4.186 \text{ kJ kcal}^{-1} = -749.3 \text{ kJ mol}^{-1}$$

$$\Delta G_R^\theta = -nFE^0$$

$$E^\theta = -\frac{\Delta G_R^\theta}{nf} = -\frac{-749.3 \times 1000}{10 \times 96500} = +0.776 \text{ V}$$

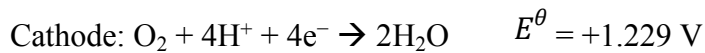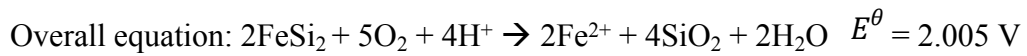

### 4. Calculation of theoretical and practical capacity

Calculation of theoretical capacity:

$$\text{Faraday's constant} = 96500 \text{ C mol}^{-1}$$

$$1 \text{ Ah} = 1 \text{ A} \times 3600 \text{ s} = 3600 \text{ C}$$

$$1 \text{ mol of electrons: } \frac{96500}{3600} = 26.8 \text{ Ah}$$

$$\text{So theoretical capacity, } C_0 = 26.8 \times n \times \frac{m}{M}$$

wherein, n is the amount of electron transition in the discharge process; m is the mass of active material in the anode, which is equal to 1 g in theoretical specific capacity calculation; M is the molar mass of active material.

| Anode material    | Theoretical capacity, Ah g <sup>-1</sup> | Practical capacity, Ah g <sup>-1</sup> | Density, g cm <sup>-3</sup> [4] | Volumetric capacity, Ah L <sup>-1</sup> | Ref.       |
|-------------------|------------------------------------------|----------------------------------------|---------------------------------|-----------------------------------------|------------|
| Zn                | 0.82                                     | 0.645                                  | 7.134                           | 4666                                    | [5]        |
| Fe                | 0.96                                     | ~0.5                                   | 7.87                            | ~3935                                   | [6]        |
| FeB               | 2.41                                     | 1.2                                    | ~7                              | ~8400                                   | [7]        |
| Si                | 3.82                                     | 1.206                                  | 2.3296                          | 2809                                    | [8]        |
| TiSi <sub>2</sub> | 3.07                                     | ~1.8                                   | 4.0                             | ~7200                                   | [9]        |
| FeSi <sub>2</sub> | 2.39                                     | 1.90                                   | 4.74                            | 9006                                    | This paper |

**Table S1** Summary of theoretical and practical capacity of different anode materials and their volumetric capacity from different references and this paper.

For FeSi<sub>2</sub>:

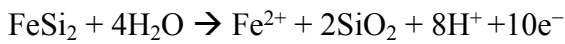

$$M = 112.03 \text{ g mol}^{-1};$$

$$n = 10$$

$$C_0 = 26.8 \times 10 \times \frac{1}{112.03} = 2.39 \text{ Ah g}^{-1}$$

Density of FeSi<sub>2</sub> is 4.74 g cm<sup>-3</sup> [4]

$$\text{Volumetric specific capacity} = 2.39 \times 4.74 = 11.33 \text{ Ah cm}^{-3} = 11330 \text{ Ah L}^{-1}$$

For FeB: [7]

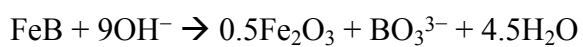

$$M = 66.656 \text{ g mol}^{-1}$$

$$n = 6$$

$$C_0 = 26.8 \times 6 \times \frac{1}{66.656} = 2.41 \text{ Ah g}^{-1}$$

Density of FeB is ~7 g cm<sup>-3</sup> [4]

$$\text{Volumetric specific capacity} = 2.41 \times 7 = 16.89 \text{ Ah cm}^{-3} = 16890 \text{ Ah L}^{-1}$$

Reference: Exceptional electrochemical activities of amorphous Fe–B and Co–B alloy powders used as high capacity anode materials

$$\text{Practical gravimetric specific capacity} = 1200 \text{ mAh g}^{-1} = 1.200 \text{ Ah g}^{-1}$$

$$\text{Practical volumetric specific capacity} = 1.200 \text{ Ah g}^{-1} \times 7 \times 1000 = 8400 \text{ Ah L}^{-1}$$

For Si:

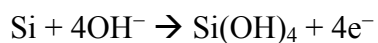

$$M = 28.09 \text{ g mol}^{-1}$$

$$n = 4$$

$$C_0 = 26.8 \times 4 \times \frac{1}{28.09} = 3.82 \text{ Ah g}^{-1}$$

Density of Si is  $2.3296 \text{ g cm}^{-3}$  [4]

$$\text{Volumetric specific capacity} = 3.82 \times 2.3296 = 8.89 \text{ Ah cm}^{-3} = 8890 \text{ Ah L}^{-1}$$

$$\text{Practical gravimetric specific capacity} = 1206 \text{ mAh g}^{-1} = 1.206 \text{ Ah g}^{-1} \text{ [8]}$$

$$\text{Practical volumetric specific capacity} = 1.206 \text{ Ah g}^{-1} \times 2.3296 \times 1000 = 2809 \text{ Ah L}^{-1}$$

For  $\text{TiSi}_2$

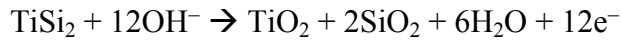

$$M = 104.86 \text{ g mol}^{-1}$$

$$n = 12$$

$$C_0 = 26.8 \times 12 \times \frac{1}{104.86} = 3.07 \text{ Ah g}^{-1}$$

Density of  $\text{TiSi}_2$  is  $4.0 \text{ g cm}^{-3}$  [4]

$$\text{Volumetric specific capacity} = 3.07 \times 4.0 = 12.28 \text{ Ah cm}^{-3} = 12800 \text{ Ah L}^{-1}$$

$$\text{Practical gravimetric specific capacity} = 1800 \text{ mAh g}^{-1} = 1.800 \text{ Ah g}^{-1} \text{ [9]}$$

$$\text{Practical volumetric specific capacity} = 1.800 \text{ Ah g}^{-1} \times 4.0 \times 1000 = 7200 \text{ Ah L}^{-1}$$

For Zn:

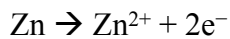

$$M = 65.38 \text{ g mol}^{-1}$$

$$n = 2$$

$$C_0 = 26.8 \times 2 \times \frac{1}{65.38} = 0.82 \text{ Ah g}^{-1}$$

Density of Si is  $7.134 \text{ g cm}^{-3}$  [4]

Volumetric specific capacity =  $0.82 \times 7.134 = 5.849 \text{ Ah cm}^{-3} = 5849 \text{ Ah L}^{-1}$  [5]

Reference:

For Fe:

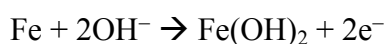

$$M = 55.85 \text{ g mol}^{-1}$$

$$n = 2$$

$$C_0 = 26.8 \times 2 \times \frac{1}{55.85} = 0.96 \text{ Ah g}^{-1}$$

Density of Fe is  $7.87 \text{ g cm}^{-3}$  [4]

Volumetric specific capacity =  $0.96 \times 7.87 = 7.56 \text{ Ah cm}^{-3} = 7560 \text{ Ah L}^{-1}$

Practical gravimetric specific capacity =  $500 \text{ mAh g}^{-1} = 0.500 \text{ Ah g}^{-1}$

Practical volumetric specific capacity =  $0.500 \text{ Ah g}^{-1} \times 7.87 \times 1000 = 3935 \text{ Ah L}^{-1}$

## Reference

- 1 M.A. Amin, K.F. Khaled, Q. Mohsen, H.A. Arida, *Corros. Sci.*, 2010, **52**, 1684-1695.
- 2 S.M. Lee, Y.J. Kim, S.W. Eom, N.S. Choi, K.W. Kim, S.B. Cho, *J. Power Sources*, 2013, **227**, 177-184.
- 3 J.A. Dean, *Lange's handbook of chemistry*, 15 ed., McGraw-Hill, United States of America, 1999.
- 4 D.R. Lide, *CRC handbook of chemistry and physics*, CRC Press, 2010.

- 5 Energizer, Product datasheet. <http://data.energizer.com/PDFs/675.pdf>.
- 6 B.T. Hang, H. Hayashi, S.H. Yoon, S. Okada, J. Yamaki, *J. Power Sources*, 2008, **178**, 393-401.
- 7 Y.D. Wang, X.P. Ai, Y.L. Cao, H.X. Yang, *Electrochem. Commun.*, 2004, **6**, 780-784.
- 8 X. Zhong, H. Zhang, Y. Liu, J. Bai, L. Liao, Y. Huang, X. Duan, *ChemSusChem*, 2012, **5**, 177-180.
- 9 H. Zhang, X. Zhong, J.C. Shaw, L. Liu, Y. Huang, X. Duan, *Energ. Environ. Sci.*, 2013, **6**, 2621-2625.
